# Supplementary material for: Impact of Patient Body Posture on RF-Induced Energy Absorption by Orthopedic Plates
Source: Hindawi journal article supplement (doi:10.1155/2024/7418643), 2024-04-30
Supplement: f1 [file 7418643.f1.pdf]

## SAR

3T140

|   | O       | X1      | X2      | X3      |         | Y1      | Y2      | Y3      |         | Z1      | Z2      | Z3      |
|---|---------|---------|---------|---------|---------|---------|---------|---------|---------|---------|---------|---------|
| 1 | 109.048 | 106.229 | 129.55  | 112.507 | 109.048 | 144.68  | 157.427 | 172.716 | 109.048 | 188.229 | 174.108 | 219.213 |
| 2 | 120.541 | 113.134 | 105.892 | 115.874 | 120.541 | 124.015 | 124.977 | 138.845 | 120.541 | 171.837 | 169.19  | 187.429 |
| 3 | 116.432 | 107.522 | 80.5983 | 102.367 | 116.432 | 78.5582 | 68.2014 | 75.6152 | 116.432 | 135.609 | 150.837 | 141.976 |
| 4 | 90.1245 | 77.0745 | 60.0374 | 57.7198 | 90.1245 | 28.6751 | 29.1097 | 33.2386 | 90.1245 | 87.238  | 114.65  | 94.6851 |

1.5T140

|   | O       | X1      | X2      | X3      |         | Y1      | Y2      | Y3      |         | Z1      | Z2      | Z3      |
|---|---------|---------|---------|---------|---------|---------|---------|---------|---------|---------|---------|---------|
| 1 | 110.796 | 117.613 | 129.55  | 118.863 | 110.796 | 89.219  | 83.3516 | 89.312  | 110.796 | 111.6   | 92.4422 | 83.9822 |
| 2 | 106.373 | 101.936 | 105.892 | 95.0877 | 106.373 | 76.3075 | 54.9409 | 60.8943 | 106.373 | 92.3096 | 96.2762 | 74.4724 |
| 3 | 95.5497 | 82.7901 | 80.5983 | 67.4967 | 95.5497 | 75.3696 | 59.9141 | 72.5028 | 95.5497 | 73.9379 | 94.7809 | 64.8906 |
| 4 | 83.7887 | 67.5544 | 60.0374 | 43.8829 | 83.7887 | 92.2355 | 76.8331 | 93.5728 | 83.7887 | 58.1801 | 90.185  | 57.8711 |

3T120

|   | O       | X1      | X2      | X3      |         | Y1       | Y2       | Y3       |         | Z1      | Z2      | Z3      |
|---|---------|---------|---------|---------|---------|----------|----------|----------|---------|---------|---------|---------|
| 1 | 90.5513 | 82.7388 | 94.6929 | 98.4865 | 90.5513 | 111.8834 | 119.4968 | 144.9694 | 90.5513 | 167.713 | 144.225 | 177.033 |
| 2 | 100.989 | 87.9275 | 98.0985 | 101.053 | 100.989 | 95.42794 | 94.10363 | 116.0245 | 100.989 | 154.257 | 136.524 | 153.82  |
| 3 | 97.4503 | 82.7236 | 92.8756 | 88.4618 | 97.4503 | 59.90651 | 50.04342 | 62.61863 | 97.4503 | 123.696 | 117.511 | 121.51  |
| 4 | 76.9094 | 59.3832 | 68.8693 | 49.0798 | 76.9094 | 21.33356 | 12.80463 | 15.84314 | 76.9094 | 74.3426 | 88.9564 | 87.1562 |

1.5T120

|   | O       | X1      | X2      | X3      |         | Y1      | Y2      | Y3      |         | Z1      | Z2      | Z3      |
|---|---------|---------|---------|---------|---------|---------|---------|---------|---------|---------|---------|---------|
| 1 | 91.5387 | 94.0844 | 110.685 | 99.4384 | 91.5387 | 77.5472 | 83.3916 | 81.7567 | 91.5387 | 101.279 | 72.6333 | 66.9093 |
| 2 | 87.9273 | 81.2705 | 90.2435 | 79.8207 | 87.9273 | 86.8907 | 72.6663 | 62.0671 | 87.9273 | 84.4765 | 74.7243 | 62.2604 |
| 3 | 78.9087 | 66.1045 | 68.3818 | 56.8873 | 78.9087 | 87.581  | 76.5512 | 61.4527 | 78.9087 | 65.8057 | 73.938  | 56.6313 |
| 4 | 69.711  | 54.0804 | 50.7839 | 44.1265 | 69.711  | 103.546 | 98.4943 | 78.375  | 69.711  | 50.1645 | 72.8047 | 51.8333 |

3T100

|   | O       | X1      | X2      | X3      |         | Y1      | Y2      | Y3      |         | Z1      | Z2      | Z3      |
|---|---------|---------|---------|---------|---------|---------|---------|---------|---------|---------|---------|---------|
| 1 | 76.6543 | 68.5589 | 70.1739 | 76.7506 | 76.6543 | 92.6986 | 95.8886 | 109.477 | 76.6543 | 154.253 | 114.847 | 146.13  |
| 2 | 86.4973 | 73.7101 | 73.3228 | 79.2435 | 86.4973 | 79.1644 | 74.9667 | 87.1593 | 86.4973 | 144.29  | 116.465 | 128.29  |
| 3 | 84.665  | 69.2233 | 68.0755 | 68.8657 | 84.665  | 49.5408 | 38.8404 | 46.5124 | 84.665  | 118.503 | 110.029 | 105.187 |
| 4 | 68.1159 | 51.4183 | 52.3221 | 44.8368 | 68.1159 | 33.4728 | 44.9948 | 28.9276 | 68.1159 | 75.4417 | 90.2976 | 79.4182 |

1.5T100

|   | O       | X1      | X2      | X3      |         | Y1      | Y2      | Y3      |         | Z1      | Z2      | Z3      |
|---|---------|---------|---------|---------|---------|---------|---------|---------|---------|---------|---------|---------|
| 1 | 74.3995 | 75.4387 | 85.4678 | 78.574  | 74.3995 | 73.7772 | 60.9217 | 79.6268 | 74.3995 | 87.8899 | 61.6164 | 61.3339 |
| 2 | 71.7512 | 65.4986 | 68.4494 | 63.3176 | 71.7512 | 68.9905 | 84.5675 | 60.9098 | 71.7512 | 74.4033 | 67.1385 | 57.5682 |
| 3 | 64.7787 | 53.2414 | 52.0942 | 51.3329 | 64.7787 | 86.3417 | 105.361 | 60.5157 | 64.7787 | 58.3097 | 67.5359 | 52.2996 |
| 4 | 57.3859 | 43.7188 | 38.5956 | 45.0813 | 57.3859 | 112.404 | 134.342 | 77.461  | 57.3859 | 44.2228 | 65.3213 | 45.0335 |

3T80

|   | O       | X1      | X2      | X3      |         | Y1      | Y2      | Y3      |         | Z1      | Z2      | Z3      |
|---|---------|---------|---------|---------|---------|---------|---------|---------|---------|---------|---------|---------|
| 1 | 56.6549 | 53.347  | 52.2627 | 55.6357 | 56.6549 | 85.2712 | 79.1378 | 98.6326 | 56.6549 | 98.2849 | 84.9853 | 105.439 |
| 2 | 65.3115 | 57.9336 | 55.6831 | 58.3138 | 65.3115 | 56.1347 | 55.9277 | 63.6442 | 65.3115 | 99.0567 | 87.4722 | 93.5552 |
| 3 | 64.4833 | 54.7929 | 51.52   | 50.4679 | 64.4833 | 38.9388 | 37.3426 | 37.7519 | 64.4833 | 86.7351 | 84.5157 | 79.2568 |
| 4 | 53.0247 | 41.5634 | 44.0643 | 44.1381 | 53.0247 | 31.007  | 30.6821 | 28.7571 | 53.0247 | 60.9268 | 75.6834 | 63.2149 |

1.5T80

|   | O       | X1      | X2      | X3      |         | Y1      | Y2      | Y3      |         | Z1      | Z2      | Z3      |
|---|---------|---------|---------|---------|---------|---------|---------|---------|---------|---------|---------|---------|
| 1 | 57.8803 | 61.4752 | 68.3252 | 64.3002 | 57.8803 | 73.9608 | 60.133  | 75.8299 | 57.8803 | 62.1554 | 54.6602 | 60.8569 |
| 2 | 55.7325 | 53.1359 | 54.3809 | 53.7514 | 55.7325 | 71.1549 | 52.5186 | 56.6395 | 55.7325 | 56.1753 | 51.7969 | 60.2248 |
| 3 | 50.2182 | 44.8483 | 44.1014 | 51.0584 | 50.2182 | 81.2903 | 72.0387 | 57.7747 | 50.2182 | 45.9549 | 52.4532 | 51.5742 |
| 4 | 44.7245 | 38.4148 | 37.9558 | 44.5007 | 44.7245 | 101.209 | 92.8057 | 73.7569 | 44.7245 | 38.1901 | 51.1722 | 43.5533 |

Relative difference in SAR

|         | X1       | X2       | X3       | Y1       | Y2       | Y3       | Z1       | Z2       | Z3       |
|---------|----------|----------|----------|----------|----------|----------|----------|----------|----------|
| 3T140   |          |          |          |          |          |          |          |          |          |
| 1       | 0.025851 | 0.188009 | 0.03172  | 0.326755 | 0.443649 | 0.583853 | 0.726111 | 0.596618 | 1.010243 |
| 2       | 0.061448 | 0.121527 | 0.038717 | 0.02882  | 0.036801 | 0.151849 | 0.425548 | 0.403589 | 0.554898 |
| 3       | 0.076525 | 0.307765 | 0.1208   | 0.325287 | 0.414238 | 0.350563 | 0.164706 | 0.295494 | 0.21939  |
| 4       | 0.1448   | 0.333839 | 0.359555 | 0.681828 | 0.677006 | 0.631192 | 0.032028 | 0.272129 | 0.050603 |
| Max     | 0.1448   | 0.333839 | 0.359555 | 0.681828 | 0.677006 | 0.631192 | 0.726111 | 0.596618 | 1.010243 |
| 1.5T140 |          |          |          |          |          |          |          |          |          |
| 1       | 0.061527 | 0.169266 | 0.072809 | 0.194745 | 0.247702 | 0.193906 | 0.007257 | 0.165654 | 0.242011 |
| 2       | 0.041712 | 0.004522 | 0.106092 | 0.282642 | 0.483507 | 0.42754  | 0.132208 | 0.094919 | 0.299894 |
| 3       | 0.133539 | 0.156478 | 0.293596 | 0.2112   | 0.372954 | 0.241203 | 0.226184 | 0.008046 | 0.320871 |
| 4       | 0.193753 | 0.283467 | 0.476267 | 0.100811 | 0.083014 | 0.116771 | 0.305633 | 0.076338 | 0.309321 |
| Max     | 0.193753 | 0.283467 | 0.476267 | 0.282642 | 0.483507 | 0.42754  | 0.305633 | 0.165654 | 0.320871 |
| 3T120   |          |          |          |          |          |          |          |          |          |
| 1       | 0.086277 | 0.045738 | 0.087632 | 0.23558  | 0.319659 | 0.600965 | 0.852132 | 0.592744 | 0.955058 |
| 2       | 0.129336 | 0.028622 | 0.000634 | 0.055066 | 0.068179 | 0.148882 | 0.527463 | 0.35187  | 0.523136 |
| 3       | 0.15112  | 0.046944 | 0.092237 | 0.385261 | 0.486472 | 0.35743  | 0.269324 | 0.205856 | 0.246892 |
| 4       | 0.227881 | 0.10454  | 0.361849 | 0.722614 | 0.83351  | 0.794003 | 0.033374 | 0.156639 | 0.133232 |
| Max     | 0.227881 | 0.10454  | 0.361849 | 0.722614 | 0.83351  | 0.794003 | 0.852132 | 0.592744 | 0.955058 |
| 1.5T120 |          |          |          |          |          |          |          |          |          |
| 1       | 0.02781  | 0.209161 | 0.086299 | 0.152848 | 0.089002 | 0.106862 | 0.106406 | 0.206529 | 0.26906  |
| 2       | 0.075708 | 0.026342 | 0.092197 | 0.011789 | 0.173564 | 0.294109 | 0.039246 | 0.150158 | 0.29191  |
| 3       | 0.162266 | 0.133406 | 0.279074 | 0.109903 | 0.029876 | 0.221218 | 0.166053 | 0.062993 | 0.282319 |
| 4       | 0.22422  | 0.271508 | 0.367008 | 0.485361 | 0.412895 | 0.124285 | 0.280393 | 0.044379 | 0.256455 |
| Max     | 0.22422  | 0.271508 | 0.367008 | 0.485361 | 0.412895 | 0.294109 | 0.280393 | 0.206529 | 0.29191  |
| 3T100   |          |          |          |          |          |          |          |          |          |
| 1       | 0.105609 | 0.084541 | 0.001256 | 0.209307 | 0.250923 | 0.428191 | 1.01232  | 0.498246 | 0.906351 |
| 2       | 0.147834 | 0.152311 | 0.083862 | 0.084776 | 0.133306 | 0.007653 | 0.668145 | 0.346458 | 0.483168 |
| 3       | 0.182386 | 0.195943 | 0.18661  | 0.414861 | 0.541246 | 0.45063  | 0.399669 | 0.299581 | 0.242391 |
| 4       | 0.245135 | 0.231867 | 0.341757 | 0.508591 | 0.339438 | 0.575318 | 0.107549 | 0.325646 | 0.165927 |
| Max     | 0.245135 | 0.231867 | 0.341757 | 0.508591 | 0.541246 | 0.575318 | 1.01232  | 0.498246 | 0.906351 |
| 1.5T100 |          |          |          |          |          |          |          |          |          |
| 1       | 0.013968 | 0.148768 | 0.056109 | 0.008364 | 0.181154 | 0.07026  | 0.181324 | 0.171817 | 0.175614 |
| 2       | 0.087143 | 0.046017 | 0.117539 | 0.038476 | 0.178621 | 0.151097 | 0.036962 | 0.064287 | 0.197669 |
| 3       | 0.178103 | 0.195813 | 0.207565 | 0.332872 | 0.626476 | 0.065809 | 0.099863 | 0.042563 | 0.192642 |
| 4       | 0.238161 | 0.327438 | 0.214419 | 0.958739 | 1.341028 | 0.349826 | 0.229379 | 0.138281 | 0.215251 |
| Max     | 0.238161 | 0.327438 | 0.214419 | 0.958739 | 1.341028 | 0.349826 | 0.229379 | 0.171817 | 0.215251 |
| 3T80    |          |          |          |          |          |          |          |          |          |
| 1       | 0.058387 | 0.077526 | 0.01799  | 0.505098 | 0.396839 | 0.740937 | 0.7348   | 0.500052 | 0.861075 |
| 2       | 0.112965 | 0.147423 | 0.107143 | 0.140508 | 0.143678 | 0.025528 | 0.516681 | 0.339308 | 0.432446 |
| 3       | 0.150278 | 0.201033 | 0.217349 | 0.396141 | 0.420895 | 0.414548 | 0.345078 | 0.31066  | 0.229106 |
| 4       | 0.21615  | 0.168985 | 0.167594 | 0.415235 | 0.421362 | 0.457666 | 0.149027 | 0.427323 | 0.192178 |
| Max     | 0.21615  | 0.201033 | 0.217349 | 0.505098 | 0.421362 | 0.740937 | 0.7348   | 0.500052 | 0.861075 |
| 1.5T80  |          |          |          |          |          |          |          |          |          |
| 1       | 0.062109 | 0.180457 | 0.110917 | 0.277823 | 0.03892  | 0.310116 | 0.073861 | 0.055634 | 0.051427 |
| 2       | 0.04659  | 0.024252 | 0.035547 | 0.276722 | 0.057667 | 0.016274 | 0.007945 | 0.070616 | 0.080605 |
| 3       | 0.106931 | 0.121804 | 0.016731 | 0.618742 | 0.434514 | 0.150473 | 0.084896 | 0.044506 | 0.027002 |
| 4       | 0.141079 | 0.151342 | 0.005004 | 1.262943 | 1.075053 | 0.649139 | 0.146103 | 0.144165 | 0.026187 |
| Max     | 0.141079 | 0.180457 | 0.110917 | 1.262943 | 1.075053 | 0.649139 | 0.146103 | 0.144165 | 0.080605 |

| Maximm relative difference for pSAR1g between the O-posture and other postures |          |          |          |     |          |          |          |  |
|--------------------------------------------------------------------------------|----------|----------|----------|-----|----------|----------|----------|--|
| 1.5T                                                                           | X        | Y        | Z        | 3T  | X        | Y        | Z        |  |
| 140                                                                            | 0.476267 | 0.483507 | 0.320871 | 140 | 0.359555 | 0.681828 | 1.010243 |  |
| 120                                                                            | 0.367008 | 0.485361 | 0.29191  | 120 | 0.361849 | 0.83351  | 0.955058 |  |
| 100                                                                            | 0.327438 | 1.341028 | 0.229379 | 100 | 0.341757 | 0.575318 | 1.01232  |  |
| 80                                                                             | 0.180457 | 1.262943 | 0.146103 | 80  | 0.217349 | 0.740937 | 0.861075 |  |
